# Supplementary material for: Sylvatic host associations of Triatominae and implications for Chagas disease reservoirs: a review and new host records based on archival specimens
Source: PeerJ. 2017 Sep 18;5:e3826. doi: 10.7717/peerj.3826 (PMC5609523; doi:10.7717/peerj.3826)
Supplement: Table S1 [file peerj-05-3826-s002.xlsx]

## Sheet: Sheet1
Supp. Table 1. Sylvatic host associations of Triatominae excluding laboratory data and "domestic" animals (except humans and rodents)
	Genus	species	Common Name / Category	More specific identity, if present	Type of observation	Reference(s)
	Alberprosenia
		goyovargasi
			Reptile
				Lacertilia	Associational	Barrett 1991
				Serpentes	Associational	Barrett 1991
		malheiroi
			Bat	Peropteryx	Associational	Carcavallo et al. 1995
			Bird	Picidae	Associational	Carcavallo et al. 1998
	Belminus
		corredori
		costaricensis
			Arthropod
				Nasutitermes	Associational	Lent and Wygodzinsky 1979
				Trigona	Associational	Lent and Wygodzinsky 1979
			Sloth		Associational	Vargas and Montero-Gei 1971; Ryckman 1986
		ferroae
			Arthropod	Blattodea	Antibody-based	Sandoval et al. 2010
			Human		Antibody-based	Sandoval et al. 2010
			Rodent		Antibody-based	Sandoval et al. 2010
		herreri
			Arthropod	Blattidae	Antibody-based	Sandoval et al. 2004
			Bird		Antibody-based	Sandoval et al. 2004
			Human		Antibody-based	Sandoval et al. 2004
			Marsupial
				Didelphis	Antibody-based	Sandoval et al. 2004
			Reptile		Antibody-based | Associational	Sandoval et al. 2004 | Ryckman 1986
				Thecadactylus	Associational	Gaunt and Miles 2000
			Rodent (Muroidea)		Antibody-based	Sandoval et al. 2004
		laportei
		peruvianus
			Arthropod	cannibalism	Associational	Ryckman 1951; Herrer et al. 1954; Lent and Wygodzinsky 1979
			Human		Associational	Ryckman 1951; Herrer et al. 1954; Lent and Wygodzinsky 1979
			Marsupial
				Didelphis		Carcavallo et al. 1998
			Reptile
				Gekkota (gecko)	Associational	Lent and Wygodzinsky 1979
				Geochelone chilensis
				Lacertidae		Ryckman 1951; Herrer et al. 1954
		pittieri			Associational
		rugulosus
			Sloth	Bradypodidae (three-toed sloth)	Associational	Usinger 1944
	Bolbodera	scabrosa
			Rodent (Octodontoidea)	Capromys	Associational	Ryckman 1986
				Capromys melanurus	Associational	Alayo 1967
				Capromys pilorides	Associational	Alayo 1967; Lent and Wygodzinsky 1979
	Cavernicola	lenti
			Bat	Phyllosomus elongatus	Associational	Barrett and Arias 1985
			Rodent (Muroidea)	Rhipidomys	Associational	Barrett and Arias 1985
		pilosa
			Bat		Antibody-based | Associational	Barretto et al. 1971 | Usinger 1944; Oliveira et al. 2008
				Desmodus rotundus	Associational	Lent and Wygodzinsky 1979
				Dirias albiventer	Antibody-based | Associational	Dias et al. 1942 | Dias et al. 1942
				Eumops auripendulus	Associational	Dias et al. 1942
				Molossus molossus	Associational	Barber 1937
				Myotis	Associational	Pinto et al. 2015
				Saccopteryx bilineatus	Associational	Dias et al. 1942; Lent and Wygodzinsky 1979
	Dipetalogaster	maxima
			Reptile
				Petrosaurus thalassinus	Associational	Lent and Wygodzinsky 1979
				Sauromalus australis	Associational	Lent and Wygodzinsky 1979; Ryckman 1986
			Rodent (Muroidea)		Associational	Lent and Wygodzinsky 1979
				Neotoma lepida	Associational	Ryckman and Ryckman 1967a
	Eratyrus
		cuspidatus	Arthropod		Associational	Galindo and Fairchild 1962
			Armadillo		Associational	Johnson and Rivas 1936
			Bat		Associational	Galindo and Fairchild 1962; Lent and Wygodzinsky 1979; Ryckman 1986
			Human		Associational	Lent and Wygodzinsky 1979
		mucronatus
			Amphibian
				Dendrobatidae	Associational	Monte et al. 2014
				Leptodactylidae	Associational	Monte et al. 2014
			Arthropod	Amblypygi	Associational	Miles et al. 1981; Gaunt and Miles 2000
				Nasutitermes	Associational	Monte et al. 2014
				Blaberus	Associational	Durán et al. 2016
			Bat		Associational	Lent and Wygozinksy 1979; Monte et al. 2014
			Marsupial	Didelphis marsupialis	Associational	Miles et al. 1981
			Monkey		Associational	Barrett 1991
			Musteloid (Procyonidae; Racoons and relatives)	Potos flavus	Associational	Barrett 1991
			Human		Antibody-based	Avendano-Rangel et al. 2011
			Reptile	Gonnatodes humeralis	Associational	Monte et al. 2014
			Rodent		Antibody-based | Associational	Tonn et al. 1982 | Barrett 1991
			Rodent (Erethizontoidea)		Antibody-based	Tonn et al. 1982
				Coendou	Associational	Miles et al. 1981
				Coendou prehensilis	Associational	Gaunt and Miles 2000
			Sloth		Associational	Barrett 1991
	Linshcosteus
		carnifex
		chota
		confumus
		costalis
		kali
		karupus
			Bat		Associational	Patterson 2007 (Thesis)
			Bird		Antibody-based	Patterson 2007 (Thesis)
			Canine		Antibody-based	Patterson 2007 (Thesis)
			Rodent		Antibody-based | Associational	Patterson 2007 (Thesis)
			Reptile		Associational	Patterson 2007 (Thesis)
			Ungulate (Odd or even-toed)		Antibody-based	Patterson 2007 (Thesis)
	Microtriatoma
		borbai	Marsupial	Didelphis	Antibody-based | Associational	Rodrigues et al. 1992 | Lent and Wygozinksy 1979; Rodrigues et al. 1992
			Rodent		Associational	Lent and Wygozinksy 1979
		trinidadensis	Arthropod	Lepidoptera	Associational	Barrett 1991
			Bird		Associational	De la Riva et al. 2001; Lent and Wydodzinky 1979
			Bat		Associational	Carcavallo et al. 1976; Carcavallo et al. 1998
			Marsupial		Associational	Miles et al. 1983
				Didelphis	Associational	Gaunt and Miles 2000
				Didelphis marsupialis	Antibody-based | Associational	Miles et al. 1981 | Lent and Wygodzinsky 1979
			Rodent		Antibody-based	Miles et al. 1981
			Sloth	Bradypus	Associational	Carcavallo et la. 1976; Carcavallo et al. 1998
	Panstrongylus
		chinai	Human		Associational	Barrett 1991
		diasi
			Bird		Antibody-based | Associational	Rodrigues et al. 1992 | Maes 2002
				Phacellodomus rufifrons	Associational	Cardoso 2006
			Marsupial		Antibody-based	Rodrigues et al. 1992
		geniculatus
			Armadillo		Associational | DNA-based	Usinger 1944; D'Alessandro et al. 1971; Lent and Wygodzinksky 1979; Ryckman 1986; Maes 2002; Alvarado-Otegui et al. 2012 | Hernández et al. 2016
				Dasypus novemcinctus	Associational	Neiva 1914
			Anteater		Associational	Rodrigues and Melo 1942; Maes 2002
			Anteater, Sloth or Armadillo	"Edentata"	Antibody-based	Barretto 1967; Barretto 1968; Barretto 1971
			Arthropod	Eacles	Associational	Garrouste 2009
			Bat		Associational | DNA-based	Fairchild 1943; Ryckman 1986; Maes 2002 | Hernández et al. 2016
			Bird		Antibody-based | Associational	Rodrigues et al. 1992 | Maes 2002
			Human		Antibody-based | Associational | DNA-based	Barretto 1968; Carrasco et al. 2005 | Castro-Ferreira and Deane 1938 | Hernández et. al 2016
			Marsupial		Antibody-based | DNA-based	Rodrigues et al. 1992 | Hernández et al. 2016
				Didelphimorphia (opossum)	Antibody-based | Associational	Barretto 1967; Barretto 1968; Barretto 1971 | Maes 2002
				Philander opossum	Associational	Ryckman 1986
			Monkey	Lagothrix	DNA-based (PCR)	Georgieva et al. 2016
				Saguinus	DNA-based (PCR)	Georgieva et al. 2016
			Musteloid (Mustelidae; Weasel)		DNA-based (PCR)	Georgieva et al. 2016
				Eira barbara	DNA-based (PCR)	Georgieva et al. 2016
			Rodent		Antibody-based | DNA-based	Barretto 1967; Barretto 1968; Barretto 1971; Rodrigues et al. 1992 | Hernández et al. 2016
			Rodent (Erethizontoidea)	Coendou	Associational	Maes 2002
			Rodent (Cavioidea)	Cuniculus	Associational	Maes 2002
				Dasyprocta	DNA-based (PCR)	Georgieva et al. 2016
				Dasyprocta	DNA-based (PCR)	Georgieva et al. 2016
			Rodent (Muroidea)	Murinae (mouse)	Antibody-based	Carrasco et al. 2005
				Murinae (rat)	Associational	Maes 2002
			Sloth	Choloepus didactylus	DNA-based (PCR)	Georgieva et al. 2016
		guentheri
			Bird		Associational	Carcavallo et al. 1998
			Human		Associational	De Almeida et al. 2008
			Marsupial		Associational	Carcavallo et al. 1998
			Rodent		Associational	Carcavallo et al. 1998
		howardi
			Bird	Columbidae (pigeons and doves)	DNA-based (PCR)	Villacís et al. 2015
			Rodent (Muroidea)	Murinae (mouse)	Associational	Suarez-Davalos et al. 2010
				Rattus rattus	DNA-based (PCR)	Villacís et al. 2015
			Rodent (Octodontoidea)	Echimyidae (Spiny rats)	DNA-based (PCR)	Villacís et al. 2015
		humeralis
		lenti
		lignarius
			Anteater	Tamandua tetradactyla	Associational	Carcavallo et al. 1998
			Bat	Desmodus rotundus	Associational	Carcavallo et al. 1998
			Bird		Antibody-based	Teixeira et al. 2001; Pinto et al. 2008
				Ramphastidae (toucan)	Associational	D’Alessandro et al. 1981
			Human		Antibody-based	Pinto et al. 2008
			Marsupial	Didelphis marsupialis	Associational	Carcavallo et al. 1998
			Monkey		Associational	Barrett 1991
			Rodent (Cavioidea)	Cavia porcellus	Antibody-based	Pinto et al. 2008
			Rodent (Erethizontoidea)	Coendu prehensilis	Associational	Carcavallo et al. 1998
			Rodent (Octodontoidea)	Echimyidae (Spiny rats)	Associational	Carcavallo et al. 1998
		lutzi
			Armadillo		Antibody-based | Associational	Caranha et al. 2006 | Dias-Lima et al. 2003
			Bird		Antibody-based	Caranha et al. 2006
			Marsupial	Didelphimorphia (opossum)	Antibody-based	Caranha et al. 2006
			Rodent		Antibody-based	Caranha et al. 2006
			Rodent (Cavioidea)	Kerodon rupestris	Associational	Dias-Lima et al. 2003
		megistus
			Armadillo		Antibody-based	Zeledón and Rabinovich 1981, Santos et al. 2013
			Bat		Antibody-based	Barretto 1968; Zeledón and Rabinovich 1981
			Bird		Antibody-based	Barretto 1966; Barretto 1968; Minter et al. 1973; Forattini et al. 1981; Forattini et al. 1982; Piesman et al. 1983; Rodrigues et al. 1992; Steindel et al. 1994; Lorosa et al. 2000c; Guilherme et al. 2001; Villela et al. 2010; Santos et al. 2013
				Psittacidae	Associational	Diotaiuti et al. 1993
			Human		Antibody-based	Barretto 1966; Barretto 1968; Minter et al. 1973; Minter 1976; Forattini et al. 1981; Forattini et al. 1982; Piesman et al. 1983; Rodrigues et al. 1992; Lorosa et al. 2000c; Villela et al. 2010
			Marsupial		Antibody-based	Barretto 1966; Barretto 1968; Rodrigues et al. 1992, Villela et al. 2010
				Didelphimorphia (opossum)	Antibody-based	Freitas et al. 1960, Rocha e Silva et al. ‎1975; Forattini et al. 1981, Steindel et al. 1994, Lorosa et al. 2000c; Santos et al. 2013
				Didelphis	Associational	Miles et al. 1982
			Reptile	Lacertilia	Antibody-based	Santos et al. 2013
			Rodent		Antibody-based	Barretto 1966; Barretto 1968; Rocha e Silva et al. ‎1975 Forattini et al. 1981; Forattini et al. 1982; Rodrigues et al. 1992; Steindel et al. 1994; Lorosa et al. 2000c; Villela et al. 2010; Santos et al. 2013
		martinezorum
		mitarakaensis
		rufotuberculatus
			Bat	Desmodus rotundus	Associational	D'Alessandro et al. 1981
			Human		Associational | DNA-based (PCR)	D'Alessandro et al. 1971; Guevara et al. 2014 | Georgieva et al. 2016
			Monkey	Ateles	DNA-based (PCR)	Georgieva et al. 2016
			Musteloid (Procyonidae; Racoons and relatives)		Associational	Lent and Wygodzinsky 1979
			Rodent (Erethizontoidea)	Coendou	DNA-based (PCR)	Georgieva et al. 2016
		tupynambai
			Bird		Antibody based	Lorosa et al. 2000c
			Marsupial	Didelphidae	Associational	Salvatella 1986a, b
			Human		Antibody based	Lorosa et al. 2000c
			Reptile		Associational	Salvatella 1986b
			Reptile	Lacertilia	Antibody based	Martins et al. 2006
			Rodent		Antibody based | Associational	Lorosa et al. 2000c | Salvatella 1986b
			Rodent (Muroidea)	Cricetidae	Associational	Salvatella 1986a, b
	Parabelminus
		carioca	Marsupial
				Didelphis aurita	Associational	Guimaraes and Jansen 1943
				Didelphis marsupialis	Associational	Miles et al. 1982
			Rodent (Muroidea)	Murinae (rat)	Associational	Guimaraes and Jansen 1943
		yurupucu
			Amphibian	Anura (frog)	Associational	Lent and Wygodzinsky 1979
			Reptile	Gekkota (gecko)	Associational	Lent and Wygodzinsky 1979
			Rodent		Associational	Lent and Wygodzinsky 1979
	Paratriatoma
		hirsuta
			Rodent (Muroidea)	Neotoma	Associational	Usinger 1944
				Neotoma albigula	Associational	Ryckman 1971
				Neotoma desertorum	Associational	Usinger 1944
				Neotoma fuscipes	Associational	Ryckman 1971
				Neotoma lepida	Associational | DNA-based (PCR)	Ryckman 1971 | Georgieva et al. 2016
				Neotoma mexicana	Associational	Ryckman 1971
	Psammolestes
		arthuri
			Bird		Associational	Gamboa 1965
				Campylorhynchus zonatus	Associational	Aldana et al. 1997
				Furnariidae	Associational	Ribeiro et al. 2006
				Phacellodomus rufifrons	Associational	Carcavallo et al. 1998
				Thryothorus rutilus	Associational	Gamboa 1970
				Troglodytes aedon	Associational	Carcavallo et al. 1998
				Troglodytes musculus	Associational	Carcavallo et al. 1998
			Rodent		Associational	Carcavallo et al. 1998
		coreodes
			Bird		Associational	Mazza 1942
				Coryphistera alaudina	Associational	Marti et al. 2014; Turienzo and Di Iorio 2014
				Furnariidae	Associational	González-Britez et al. 2000; Bar and Wisnivesky-Colli 2001
				Myiopsitta monacha	Associational	Lent and Wygodzinsky 1979
				Phacellodomus sp.	Associational	Santos et al. 2015
				Phacellodomus sibilatrix	Associational	Barretto 1971; Lent and Wygodzinsky 1979; Marti et al. 2014
				Pseudoseisura lophotes	Associational	Lent and Wygodzinsky 1979
		tertius
			Bird		Antibody-based | Associational	Lorosa et al. 1999b | Soares et al. 2001; Dias-Lima et al. 2003
				Anumbius annumbi	Associational	Barretto and Carvalheiro 1967
				Cacicus cela	Associational	Rebêlo et al. 1998
				Furnariidae	Antibody-based | Associational	Rodrigues et al. 1992 | Rodrigues et al. 1992; Soares et al. 2001
				Mimus saturninus	Associational	Barretto and Carvalheiro 1966
				Piaya cayana	Associational	Ribeiro et al. 2006
				Phacellodomus rufifrons	Associational	Pellegrino 1951; Barretto and Carvalheiro 1967; Gurgel-Gonçalves and Cuba 2011, Oliveira et al. 2016
				Pseudoseisura cristata	Associational	Dias-Lima et al. 2003
			Marsupial	Didelphis	Antibody-based | Associational	Barretto and Alburquerque 1967| Barretto and Carvalheiro 1967
			Rodent		Antibody-based | Associational	Barretto and Alburquerque 1967| Barretto and Carvalheiro 1967
	Rhodnius
		amazonicus
		barretti
			Monkey	Cebus	DNA-based (PCR)	Georgieva et al. 2016
				Saimiri	DNA-based (PCR)	Georgieva et al. 2016
		brethesi
			Armadillo		Associational	Lent 1948
				Dasypus novemicinctus	Associational	Carcavallo et al. 1998
				Dasypus tricinctus	Associational	Carcavallo et al. 1998
			Human		Associational	Lent and Wygodzinsky 1979
			Reptiles		Antibody-based	Mascarenhas 1991
				Iguanidae	Associational	Mascarenhas 1991
				Gonatodes humeralis	Associational	Mascarenhas 1991
				Teiidae	Associational	Mascarenhas 1991
				Thecadactylus rapicauda	Associational	Mascarenhas 1991
				Scincidae	Associational	Mascarenhas 1991
			Rodent		Antibody-based	Mascarenhas 1991
		dalessandroi
		colombiensis
		domesticus
			Human		Associational	Lent and Wygodzinsky 1979
			Rodent		Associational	Carcavallo et al. 1998
			Rodent (Octodontoidea)	Echimys blainvillei	Associational	Lent and Wygodzinsky 1979
				Echimys dasythrix	Associational	Lent and Wygodzinsky 1979
			Marsupial	Didelphis azarae	Associational	Lent and Wygodzinsky 1979
				Marmosa cinerea	Associational	Lent and Wygodzinsky 1979
		ecuadoriensis
			Bird		Antibody-based	Abad-Franch 2002
				Campylorhynchus fasciatus	Associational	Grijalva et al. 2010
				Columbidae (pigeons and doves)	Associational	Carcavallo and Tonn 1985
			Human		Antibody-based	Abad-Franch 2002
			Rodent		Antibody-based	Abad-Franch 2002
			Marsupial	Didelphis marsupalis	Antibody-based | Associational	Abad-Franch 2002 | Carcavallo and Tonn 1985
			Rodent (Cavioidea)	Cavia porcellus	Associational	Lent and Wygodzinsky 1979
			Rodent (Muroidea)	Mus musculus	Associational	Grijalva et al. 2012
			Rodent (Sciuromorpha)		Associational	Grijalva and Villacis 2009
				Sciurus stramineus	Associational	Grijalva et al. 2012
		marabaensis
		milesi
		montenegrensis
			Human		Associational	Meneguetti et al. 2015
		nasutus
			Amphibian		Antibody-based	Bento et al. 1984
			Bird		Antibody-based	Dias et al. 2008; Abad-Franch et al. 2009; Bento et al. 1984
				Columba livia	Associational	Rebêlo et al. 1998
				Furnariidae	Associational	Sarquis et al. 2006
			Human		Associational	Lent and Wygodzinsky 1979
			Marsupial		Antibody-based	Bento et al. 1984
				Didelphimorphia (opossum)	Antibody-based	Dias et al. 2008; Abad-Franch et al. 2009
			Reptile		Antibody-based	Bento et al. 1984
			Rodent		Antibody-based	Bento et al. 1984
		neglectus
			Armadillo		Antibody-based	Freitas et al. 1960
			Bat		Antibody-based	Freitas et al. 1960; Barretto 1966; Barretto 1968; Abad-Franch et al. 2009
			Bird		Antibody-based	Freitas et al. 1960; Barretto 1966; Barretto 1968; Rodrigues et al. 1992; Lorosa et al. 1999; Teixeira et al. 2001; Abad-Franch et al. 2009
					Associational	Carcavallo and Tonn 1985; Gurgel-Gonçalves and Cuba 2007
				Anumbius annumbi	Associational	Barretto and Carvalheiro 1968b
				Caracara plancus	Associational	Gurgel-Gonçalves et al. 2004
				Columba livia	Associational	Hicks 1962
				Furnariidae	Associational	Lent and Wygodzinsky 1979
				Gnorimopsar chopi	Associational	Gurgel- Gonçalves et al. 2004
				Mimus saturninus	Associational	Barretto and Carvalheiro 1966
			Human		Antibody-based	Barretto 1966; Barretto 1968; Zeledón and Rabinovich 1981
			Marsupial		Antibody-based	Barretto 1966; Barretto 1968; Rodrigues et al. 1992; Lorosa et al. 1999b; Teixeira et al. 2001
				Didelphimorphia (opossum)	Antibody-based	Freitas et al. 1960; Abad-Franch et al. 2009
			Rodent		Antibody-based	Barretto 1968; Mello 1981; Marcondes et al. 1991; Rodrigues et al. 1992; Lorosa et al. 1999b
		neivai
			Humans		Associational	Lent and Wygodzinsky 1979
		pallescens
			Amphibian		Antibody-based	Pipkin 1962; Christensen and Vasquez 1981
				Plethodontidae	DNA-based	Gottdenker et al. 2012
			Anteater		Antibody-based	Christensen and Vasquez 1981
				Cyclopes didactylus	DNA-based	Gottdenker et al. 2012
				Myrmecophagidae	Antibody-based	Christensen et al. 1980
				Tamandua mexicana	DNA-based	Gottdenker et al. 2012
			Armadillo		Associational	Johnson and Rivas 1936
			Bat		DNA-based	Hernández et al. 2016
				Carollia	DNA-based	Gottdenker et al. 2012
				Lonchophylla handleyi	DNA-based	Gottdenker et al. 2012
				Molosidae	DNA-based	Gottdenker et al. 2012
				Myotis elegans	DNA-based	Gottdenker et al. 2012
				Phyllostomatidae	DNA-based	Gottdenker et al. 2012
				Pteronotus gymnonotus	DNA-based	Gottdenker et al. 2012
				Pteronotus personatus	DNA-based	Gottdenker et al. 2012
				Saccopteryx leptura	DNA-based	Gottdenker et al. 2012
			Bird		Antibody-based | DNA-based	Christensen and Vasquez 1981; Pineda et al. 2008 | Gottdenker et al. 2012
				Cathartes aura	DNA-based	Gottdenker et al. 2012
				Columbidae (pigeons and doves)	Antibody-based	Pipkin 1962
				Cracidae (chachalacas, guans and curassows)	Antibody-based	Christensen et al. 1980
				Cracidae: Penelopinae (guans)	Antibody-based	Pipkin 1962
				Cranioleuca	DNA-based	Gottdenker et al. 2012
				Gallus gallus	DNA-based	Gottdenker et al. 2012
				Meleagris gallopavo	DNA-based	Gottdenker et al. 2012
				Nyctanassa violaceae	DNA-based	Gottdenker et al. 2012
				Ortalis vetula	DNA-based	Gottdenker et al. 2012
				Pavo cristatus	DNA-based	Gottdenker et al. 2012
				Piranga	DNA-based	Gottdenker et al. 2012
				Psittacidae (parrots)	Antibody-based	Pipkin 1962; Lent and Wygodzinsky 1979
				Rallidae (rails)	Antibody-based	Pipkin 1962
				Strigiformes (owls)	Antibody-based	Pipkin 1962
				Turdus philomelus	DNA-based	Gottdenker et al. 2012
			Human		Antibody based | Associational | DNA-based	Pipkin 1962; Christensen and Vasquez 1981; Pineda et al. 2008 | Reyes et al. 2017 | Hernández et al. 2016
			Lagomorpha	Leporidae (rabbit)	Antibody-based
			Marsupial	Didelphimorphia (opossum)	Antibody based | Associational | DNA-based	Pipkin 1962; Christensen and Vasquez 1981; Gaunt and Miles 2000; Pineda et al. 2008 | Lent and Wygodzinsky 1979 | Hernández et al. 2016
				Didelphis marsupialis	DNA-based	Gottdenker et al. 2012
				Marmosa	DNA-based	Gottdenker et al. 2012
				Metachirus nudicaudatus	DNA-based	Gottdenker et al. 2012
				Philander opossum	DNA-based	Gottdenker et al. 2012
			Monkey		Antibody-based	Christensen and Vasquez 1981
				Allouatta palliata	DNA-based	Gottdenker et al. 2012
				Cebidae	Antibody-based	Pipkin 1962
				Cebus	DNA-based	Gottdenker et al. 2012
			Musteloid (Mephitidae; Skunk)	Conepatus semistriatus	DNA-based	Gottdenker et al. 2012
			Musteloid (Mustelidae; Weasel)	Mustela sp.	DNA-based	Gottdenker et al. 2012
			Musteloid (Procyonidae; Racoons and relatives)	Potos flavus	DNA-based	Gottdenker et al. 2012
			Reptile		Antibody-based	Christensen and Vasquez 1981
				Lacertilia (Lizard)	Antibody-based	Christensen et al. 1980
				Lepidodactylus	DNA-based	Gottdenker et al. 2012
				Mabuya	DNA-based	Gottdenker et al. 2012
				Sphaerodactylus sp.	DNA-based	Gottdenker et al. 2012
			Rodent (Cavioidea)	Dasyprocta	Antibody-based	Pipkin 1962
			Rodent (Muroidea)		Antibody-based | DNA-based	Pineda et al. 2008 | Hernández et al. 2016
				Muridae	Antibody-based	Pipkin 1962
				Mus musculus	DNA-based	Gottdenker et al. 2012
				Oryzomys	Antibody-based	Pipkin 1962
				Rattus rattus	Associational	Galloway 1973
			Rodent (Erethizontoidea)	Coendou bicolor	DNA-based	Gottdenker et al. 2012
			Rodent (Octodontoidea)	Echimyidae (Spiny rats)	Antibody-based	Pipkin 1962; Christensen et al. 1980
			Rodent (Sciuromorpha)	Sciuridae	Antibody-based	Christensen et al. 1980
				Sciurus stramineus	DNA-based	Gottdenker et al. 2012
			Sloth	Bradypodidae	Antibody-based | Associational	Christensen et al. 1980 | Lent and Wygodzinsky 1979
				Choloepus hoffmanni	Associational | DNA-based	D'Alessandro et al. 1971; Lent and Wygodzinsky 1979 | Gottdenker et al. 2012
		paraensis
			Marsupial	Didelphis marsupialis	Associational	Lent and Wygodzinsky 1979
			Rodent (Octodontoidea)	Echimys chrysurus	Antibody based | Associational	Lent and Wygodzinsky 1979; Gaunt and Miles 2000 | Lent and Wygodzinsky 1979
		pictipes
			Anteater		Antibody-based	Guerrero de Moyeja and Scorza 1981
			Bat		Antibody-based	Barretto 1971
			Bird		Antibody-based	Barretto 1971; Tonn et al. 1982; Teixeira et al. 2001
			Human		Antibody-based | Associational | DNA-based	Tonn et al. 1982 | Castro-Ferreira and Deane 1938 | Teixeira et al. 2001; Georgieva et al. 2016; Hernández et al. 2016
			Marsupial		Antibody-based	Tonn et al. 1982; Teixeira et al. 2001
				Didelphis marsupialis	Antibody-based	Guerrero de Moyeja and Scorza 1981
				Marmosa cinerea	Antibody-based	Guerrero de Moyeja and Scorza 1981
			Reptile		Antibody-based	Tonn et al. 1982
			Rodent		Antibody-based	Guerrero de Moyeja and Scorza 1981; Teixeira et al. 2001
			Rodent (Cavioidea)	Cavia porcellus	Antibody-based	Cáceres et al. 2010
			Rodent (Erethizontoidea)		Antibody-based	Tonn et al. 1982
			Rodent (Muroidea)	Sigmodon	Antibody-based	Guerrero de Moyeja and Scorza 1981
		prolixus
			Anteater		Antibody-based	Guerrero de Moyeja and Scorza 1981
			Armadillo		Antibody-based | Associational	Torrealba 1970; Guerrero de Moyeja and Scorza 1981; Tonn et al. 1982; Farfán et al. 2007 | Lent and Wygodzinsky 1979
			Bat		Antibody-based | DNA-based	Angulo-Silva et al. 2016 | Hernández et al. 2016
			Bird		Antibody-based | Associational | DNA-based	Guerrero de Moyeja and Scorza 1981; Tonn et al. 1982 | Carcavallo and Tonn 1985
				Agamia agami	Associational	Gamboa 1970
				Caracara plancus	Associational	Gamboa 1970; D’Alessandro et al. 1984
				Cercibis oxycerca	Associational	Guerrero et al. 1965
				Ciconia maguari	Associational	Gamboa 1970
				Dendroica dominica	Associational	Guerrero et al. 1965
				Elanoides forficatus	Associational	Guerrero et al. 1965
				Heterospizias meridionalis	Associational	Guerrero et al. 1965
				Jabiru mycteria	Associational	Lent and Wygodzinsky 1979; Guerrero et al. 1965
				Milvago chimachima	Associational	Guerrero et al. 1965
				Mimus gilvus	Associational	Guerrero et al. 1965
				Mycteria americana	Associational	D'Alessandro et al. 1971; Guerrero et al. 1965
				Neochon jubata	Associational	Carcavallo et al. 1998
				Phacellodomus rufifrons	Associational	Carcavallo et al. 1998
				Polyborus plancus	Associational	Carcavallo et al. 1998
				Theristicus caudatus	Associational	Guerrero et al. 1965
				Thryothorus rutilus	Associational	Gamboa 1970; Carcavallo and Tonn 1985; Carcavallo et al. 1998; Ribeiro et al. 2006
				Troglodytes musculus	Associational	Guerrero et al. 1965
			Human		Antibody-based | Associational | DNA-based	Torrealba 1970; Ponce et al. 1974; Zeledón and Rabinovich 1981; Tonn et al. 1982; Sasaki et al. 2003; Feliciangeli et al. 2004; Farfán et al. 2007 | Maes 2002 | Hernández et al. 2016
			Lagomorph		Antibody based	Tonn et al. 1982
			Marsupial	Didelphimorphia (opossum)	Antibody-based | DNA-based (Transposons)	Ponce et al. 1974; Guerrero de Moyeja and Scorza 1981; Sasaki et al. 2003; Farfán et al. 2007 | Gilbert et al. 2010
				Didelphis marsupialis	Antibody-based	Guerrero de Moyeja and Scorza 1981
				Marmosa cinerea	Antibody-based	Pifano 1973
				Philander	Antibody-based	Pifano 1973
			Monkey
				Alouatta	Associational	D'Alessandro et al. 1971
				Cebus	Associational	Floch and Abonnenc 1942
				Saimiri	DNA-based (Transposons)	Gilbert et al. 2010
			Musteloid (Mephitidae; Skunk)		Antibody-based	Guerrero de Moyeja and Scorza 1981
				Conepatus semistriatus	Antibody based	Carcavallo et al. 1998
			Musteloid (Procyonidae; Racoons and relatives)	Nasua	DNA-based (PCR)	Georgieva et al. 2016
			Reptile		Antibody based	Guerrero de Moyeja and Scorza 1981; Tonn et al. 1982
				Ameiva	Antibody based	Carcavallo et al. 1998
				Iguana	Antibody-based	Angulo-Silva et al. 2016
			Rodent		Antibody-based	Torrealba 1970; Ponce et al. 1974; Guerrero de Moyeja and Scorza 1981; Tonn et al. 1982; Feliciangeli et al. 2004, Farfán et al. 2007
			Rodent (Cavioidea)		Associational	Lent and Wygodzinsky 1979
				Dasyprocta	Associational	Lent and Wygodzinsky 1979
				Cuniculus pacca	Associational	Neiva and Pinto 1923
				Cuniculus	Associational	Lent and Wygodzinsky 1979
			Rodent (Erethizontoidea)		Antibody-based | Associational | DNA-based	Tonn et al. 1982 | Lent and Wygodzinsky 1979
			Rodent (Muroidea)
				Murinae (mouse)	DNA-based	Hernández et al. 2016
				Murinae (rat)	Antibody-based	Angulo-Silva et al. 2016
				Oechomys concolor	Antibody-based	Pifano 1973
				Rattus rattus	Associational	Carcavallo et al. 1998
		robustus
			Amphibian	Anura (frog)	Associational	Carcavallo et al. 1998
			Anteater	Tamandua	DNA-based (PCR)	Dias et al. 2010
			Bat		Associational	Carcavallo et al. 1998
			Bird		Associational	Tonn et al. 1976; Ribeiro et al. 2006 ; Carcavallo et al. 1998
			Human		Antibody-based | Associational	Rossell et al. 1977 | Rojas-Cortez et al. 2016
			Marsupial		Antibody-based	Tonn et al. 1982
				Caluromys philander	Associational	Gaunt and Miles 2000
			Reptile	Lacertilia (Lizard)	Associational	Carcavallo et al. 1998
			Rodent (Muroidea)	Murinae (mice)	Antibody-based	Rossell et al. 1977
		stali
			Bird		Antibody-based	de Lima et al. 2015
			Marsupial		Antibody-based	de Lima et al. 2015
			Musteloid (Procyonidae; Racoons and relatives)	Nasua	Antibody-based | Associational	de Lima et al. 2015 | de Lima et al. 2015
			Rodent		Antibody-based	de Lima et al. 2015
		taquarussuensis
		zeledoni
		amicitiae
	Triatoma	arthurneivai
			Bird		Antibody-based	Rodrigues et al. 1992
			Marsupial		Antibody-based	Rodrigues et al. 1992
			Reptile	Lacertilia (Lizard)	Antibody-based	Rodrigues et al. 1992
				Tropidurus torquatus	Associational	Forattini et al. 1968; Baretto and Ribeiro 1981
			Rodent		Antibody-based	Baretto and Ribeiro 1981; Rodrigues et al. 1992
			Rodent (Cavioidea)	Cavia aperea	Associational	Lent and Martins 1940; Baretto and Ribeiro 1981
				Kerodon rupestris	Associational	Lent and Martins 1940; Baretto and Ribeiro 1981
			Rodent (Muroidea)	Akodon	Associational	Baretto and Ribeiro 1981
		bahiensis
		baratai
		bassolsae
	(Meccus)	barberi
			Amphibian	Anura (frog)	Antibody-based	Zárate et al. 1980
			Armadillo		Antibody-based	Zárate et al. 1980
			Bat		Antibody-based	Zárate et al. 1980
			Bird	Columbidae (pigeons and doves)	Antibody-based	Zárate et al. 1980
			Human		Antibody-based	Zárate et al. 1980
			Marsupial	Didelphimorphia (opossum)	Antibody-based	Zárate et al. 1980
				Didelphis marsupialis	Associational	Zárate and Zárate 1985
			Rodent (Geomyoidea)	Dipodomys	Antibody-based	Zárate et al. 1980
				Liomys irroratus	DNA-based (PCR)	Mota et al. 2007
			Rodent (Muroidea)	Baiomys musculus	Associational | DNA-based (PCR)	Zárate and Zárate 1985 | Mota et al. 2007
				Mus	Antibody-based	Zárate et al. 1980
				Mus musculus	DNA-based (PCR)	Mota et al. 2007
				Neotoma	Antibody-based	Zárate et al. 1980
				Peromyscus	Antibody-based	Zárate et al. 1980
				Peromyscus levipes	DNA-based (PCR)	Mota et al. 2007
				Rattus	Antibody-based	Zárate et al. 1980
				Sigmodon	Antibody-based	Zárate et al. 1980
				Sigmodon hispidus	Associational | DNA-based (PCR)	Zárate and Zárate 1985 | Mota et al. 2007
		bolivari
		boliviana
			Arthropod	Blaberus	Associational	Durán et al. 2016
		bouvieri
		brailovskyi
		brasiliensis
			Amphibian	Proceratophrys	DNA-based (PCR)	Almeida et al. 2016
			Armadillo		Antibody-based	Costa et al. 1998; Sarquis et al. 2010
			Arthropod		Antibody-based	Sarquis et al. 2010
			Bats		Associational	Guarnieri et al. 2000
			Bird		Antibody-based | Associational	Marcondes et al. 1991; Costa et al. 1998; Sarquis et al. 2010; Garcia et al. 2013 | Guarnieri et al. 2000
			Human		Antibody-based	Marcondes et al. 1991
			Marsupial	Didelphimorphia (opossum)	Antibody-based | Associational	Marcondes et al. 1991; Costa et al. 1998; Sarquis et al. 2010; Garcia et al. 2013 | Guarnieri et al. 2000
			Reptile	Iguana iguana	DNA-based (PCR)	Valença-Barbosa 2015
				Mabuya	DNA-based (PCR)	Almeida et al. 2016
				Tropidurus	DNA-based (PCR)	Valença-Barbosa 2015
				Tropidurus oreadicus	DNA-based (PCR)	Bezerra et al. 2014
				Tupinambis merianae	DNA-based (PCR)	Bezerra et al. 2014
				Tropidurus torquatus	Associational	Barrett 1979
			Rodent		Antibody-based | Associational |	Marcondes et al. 1991; Costa et al. 1998; Garcia et al. 2013 | Valença-Barbosa et al. 2014a
			Rodent (Cavioidea)	Cavia aperea	Associational	Lent and Wygodzinsky 1979
				Galea	Antibody-based | DNA-based (PCR)	Valença-Barbosa et al. 2014b | Almeida et al. 2016
				Galea spixii	DNA-based (PCR)	Bezzera et al. 2014; Valença-Barbosa 2015; Almeida et al. 2016
				Kerodon rupestris	Associational | DNA-based (PCR)	Neiva 1914; Barrett 1979; Lent and Wygodzinsky 1979 | Bezerra et al. 2014; Almeida et al. 2016
			Rodent (Octodontoidea)	Cercomys cunicularius	Associational	Guarnieri et al. 2000
				Thrichomys laurentius	Associational	Bezzera et al. 2014
		breyeri
			Rodent (Cavioidea)	Cavia	Associational	Cichero and Carcavallo 1967
				Caviidae	Associational	Lent and Wygodzinsky 1979
			Rodent (Muroidea)	Cricetidae	Associational	Lent and Wygodzinsky 1979
	(Nesotriatoma)	bruneri
		carcavalloi
			Arthropod	Hiereoblatta cassidea	Associational	Ruas-Neto and Corseuil 2002
		carrioni
			Humans		Associational	Lent and Wygodzinsky 1979
			Rodent (Muroidea)	Murinae (mouse)	Associational	Herrer 1960; Lent and Wygodzinsky 1979
		cavernicola
			Bat		Associational	Patterson 2007 (Thesis)
			Human		Associational	Lent and Wygodzinsky 1979
		circummaculata
			Arthropod	Blaptica dubia	Associational	Ruas-Neto and Corseuil 2002
				Hormetica	Associational	Lorosa et al. 2000b
			Rodent		Associational	Di Primio 1966
			Reptile	Lacertilia (Lizard)	Associational	Mazza et al. 1942
		costalimai
			Marsupial		Antibody-based	Lorosa et al. 1999
			Primate (Human or Monkey)		Antibody-based	Schofield et al. 1980
			Reptile	Lacertilia (Lizard)	Antibody-based	Schofield et al. 1980; Lorosa et al. 1999b
			Rodent		Antibody-based	Schofield et al. 1980; Lorosa et al. 1999b
			Rodent (Cavioidea)	Keredon rupestris	Associational	Verano and Galvao 1958; Lent and Wygodzinsky 1979
		deaneorum
		delpontei
			Bird	Myopsitta	Associational	Romana and Abalos 1947
				Myopsitta monachus	Associational	Lent and Wygodzinsky 1979; Noireau et al. 2000; Salvatella et al. 1993
				Phacellodomus	Associational	Abalos and Wygodzinsky 1951; Carcavallo et al. 1998
			Marsupial	Didelphimorphia (opossum)	Associational	Lent and Wygodzinsky 1979
				Marmosa	Associational	Abalos and Wygodzinsky 1951; Carcavallo et al. 1998
			Rodent (Muroidea)	Graomys	Associational	Abalos and Wygodzinsky 1951; Carcavallo et al. 1998
				Phyllotis griseoflavus	Associational	Abalos and Wygodzinsky 1951; Carcavallo et al. 1998
		dimidiata
			Amphibian		Antibody-based	Christensen et al. 1988
				Bufo	Antibody-based	Zeledón et al. 1970; Zeledón et al. 1973
			Armadillo		Antibody-based | Associational	Arzube Rodriguez 1966; Zeledón et al. 1973; Quintal and Polanco 1977; Calderón-Arguedas et al. 2001; Sasaki et al. 2003; Zeledón et al. 2005; Farfán-García 2012 | Christensen et al. 1988; Zehntner 2011; Stevens et al. 2014; Bustamante et al. 2014; López-Cancino et al. 2015
			Bat		Antibody-based	Quintal and Polanco 1976
				Desmodus rotundus	DNA-based (PCR)	Zeledón et al. 1973; Sasaki et al. 2003; Zeledón et al. 2005; Farfán-García 2012 | Christensen et al. 1988; Monteon et al. 2013; Stevens et al. 2014;
				Myotis keaysi	DNA-based (PCR)	Stevens et al. 2014
			Bird		Antibody-based | DNA-based (PCR)	Arzube Rodriguez 1966 | Zehntner 2011
				Accipitridae (hawk)	Antibody-based	Christensen et al. 1988
				Anas	DNA-based (PCR)	Stevens et al. 2014
				Ardeidae (heron)	Antibody-based	Christensen et al. 1988
				Columbidae (pigeons and doves)	Antibody-based	Christensen et al. 1988
				Pistaccidae (parrot)	Antibody-based	Christensen et al. 1988
			Canid	Urocyon cinereoargenteus	Antibody-based	Zavala Velásquez et al. 1996
			Human		Antibody-based | DNA-based (PCR)	Arzube Rodriguez 1966; Zeledón et al. 1973; Quintal and Polanco 1976; Calderón-Arguedas et al. 2001; Sasaki et al. 2003; Zeledón et al. 2005; Farfán-García 2012 | Christensen et al. 1988; Zehntner 2011; Torres-Montero et al. 2012; Stevens et al. 2014; Bustamante et al. 2014; López-Cancino et al. 2015; Díaz Cruz 2017
			Lagomorpha		Antibody-based	Christensen et al. 1988
			Marsupial	Didelphimorphia (opossum)	Antibody-based | Associational	Zeledón et al. 1970; Quintal and Polanco 1976; Ryckman 1986; Calderón-Arguedas et al. 2001 | Arzube Rodriguez 1966; Zeledón et al. 1970; Sasaki et al. 2003; Zeledón et al. 2005; Farfán-García et al. 2011; Farfán-García 2012
				Didelphis marsupialis/ Philander opossum	Antibody-based | Associational | DNA-based (PCR, HRM)	Zeledón et al. 1973 | Zeledón et al. 1973; Zavala-Velásquez et al. 1996 | Peña et al. 2012
				Didelphis virginiana	Associational | DNA-based (PCR)	Ruiz-Piña and Cruz-Reyes 2002 | Stevens et al. 2014
				Philander	DNA-based (PCR)	Stevens et al. 2014
					Antibody-based	Christensen et al. 1988
			Monkey		Antibody-based	Quintal and Polanco 1977
				Cebus	DNA-based (PCR)	Georgieva et al. 2016
			Reptile		Antibody-based	Arzube Rodriguez 1966
				Serpentes (snake)	Antibody-based | Associational	Zeledón et al. 1970; Zeledón et al. 1973 | Zeledón et al. 1973
			Rodent		Antibody-based	Arzube Rodriguez 1966; Zeledón et al. 1970; Farfán-García 2012
			Rodent (Erethizontoidea)	Coendou prehensilis	Associational	Zeledón et al. 1970; Farfán-García 2012
			Rodent (Muroidea)		Antibody-based | DNA-based(PCR)	Quintal and Polanco 1977; Calderón-Arguedas et al. 2001| Díaz Cruz 2017
				Cricetidae (rice rat)	Antibody-based	Christensen et al. 1988
				Mus musculus	DNA-based (PCR)	Torres-Montero et al. 2012; Bustamante et al. 2014
				Murinae (mice)	DNA-based (PCR)	Monteon et al. 2013
				Murinae (rats)	Antibody-based | DNA-based (PCR)	Arzube-Rodriguez 1966; Zeledón et al. 1973; Christensen et al. 1988 | Stevens et al. 2014
				Peromyscus leucopus	Antibody-based	Zavala-Velásquez et al. 1996
				Rattus rattus	Antibody-based | DNA-based (PCR)	Christensen et al. 1988 | Torres-Montero et al. 2012; Bustamante et al. 2014
				Sigmodon hispidus	DNA-based (PCR)	Mota et al. 2007
		dispar
			Bat	Molossus molossus and Myotis	Associational	Pinto et al. 2015
				Myotis	Associational	Pinto et al. 2015
			Human		Associational	Vargas and Montero-Gei 1971; Maes 2002; Lent and Wygodzinsky 1979
			Musteloid (Procyonidae; Racoons and relatives)		DNA-based (PCR)	Georgieva et al. 2016
			Sloth	Choloepus	Associational	Galindo and Fairchild 1962; Sousa and Galindo 1972
				Choloepus hoffmanni	Associational	Galindo and Fairchild 1962; Lent and Wygodzinsky 1979
		eratyrusiformis
			Armadillos		Associational	Lent and Wygodzinsky 1979
			Human		Associational	Abalos and Wygodzinsky 1951
			Rodent (Cavioidea)	Caviinae	Antibody-based	Cecere et al. 2016
				Microcavia australis	Associational	Lent and Wygodzinsky 1979
			Rodent (Muroidea)	Murinae (mouse)	Antibody-based	Cecere et al. 2016
	(Nesotriatoma)	flavida
			Human	Humans	Associational	Lent and Wygodzinsky 1979
			Rodent (Octodontoidea)	Capromys pilorides	Associational	Bruner 1926
		garciabesi
			Bird		Associational	Barrett 1991
	(Mepraia)	gajardoi
			Bird	Cathartes aura	Associational	Botto-Mahan et al. 2008
				Larus dominicanus	Associational	Botto-Mahan et al. 2008
				Larus modestus	Associational	Botto-Mahan et al. 2008
		gerstaeckeri
			Armadillo	Dasypus novemcinctus	DNA-based (PCR)	Gorchakov et al. 2016
			Arthropod	Gryllus	DNA-based (PCR)	Kjos et al. 2013
			Bat	Nycticeius humeralis	DNA-based (PCR)	Gorchakov et al. 2016
			Bird	Coragyps atratus	DNA-based (PCR)	Kjos et al. 2013
				Corvus	Associational	Packchanian 1939; Elkins 1951
			Canid	Urocyon cinereoargenteus	DNA-based (PCR)	Gorchakov et al. 2016
			Deer	Odocoileus virginianus	DNA-based (PCR)	Gorchakov et al. 2016
			Human		Associational | DNA-based (PCR)	Martinez-Ibarra et al. 1992; Gorchakov et al. 2016
			Lagomorpha	Sylvilagus audubonii	DNA-based (PCR)	Gorchakov et al. 2016
			Marsupial	Didelphis mesamericana	Associational	Aguirre 1947
			Musteloid (Mustelidae; Weasel)		DNA-based (PCR)	Gorchakov et al. 2016
			Musteloid (Procyonidae; Racoons and relatives)	Procyon lotor	DNA-based (PCR)	Kjos et al. 2013; Gorchakov et al. 2016; Curtis-Robles 2016
			Reptile	Drymarchon corais	Associational	Lent and Wygodzinsky 1979
			Rodent (Erethizontoidea)	Erethizon dorsatum	DNA-based (PCR)	Gorchakov et al. 2016
			Rodent (Muroidea)	Mus musculus	DNA-based (PCR)	Gorchakov et al. 2016
				Neotoma	Associational | DNA-based (PCR)	Wilson et al. 1981 | Kjos et al. 2013
				Neotoma micropus	Associational | DNA-based (PCR)	Packchanian 1939; Ryckman 1986 | Kjos et al. 2013; Gorchakov et al. 2016
			Rodent (Sciuromorpha)	Marmotini (Ground squirrels)	Associational	Wood and Wood 1961
		gomeznunezi
		guasayana
			Amphibian	Bufo arenarum	Associational	Lent and Wygodzinsky 1979
			Bird		Associational	Lent and Wygodzinsky 1979
				Agelasticus cyanopus	DNA-based (PCR)	Lucero et al. 2014
				Furnariidae	Associational	González-Britez et al. 2000
			Marsupial	Didelphimorphia (opossum)	DNA-based (PCR)	Lucero et al. 2014
			Reptile		Associational	Lent and Wygodzinsky 1979
				Gekkota (gecko)	Associational	Lent and Wygodzinsky 1979
			Rodent (Muroidea)	Graomys	Associational	Carcavallo et al. 1998
				Phyllotis griseoflavus	Associational	Carcavallo et al. 1998
		guazu
			Bird		Antibody-based	Lorosa et al. 2008
			Musteloid (Mephitidae; Skunk)		Antibody-based	Lorosa et al. 2008
			Rodent		Antibody-based	Lorosa et al. 2008
		hegneri
			Marsupial	Didelphimorphia (opossum)	Associational	Gonzalez-Angulo and Ryckman 1967
		incrassata
			Rodent (Muroidea)	Citellus variagatus	Associational	Mazzotti 1940
				Neotoma	Associational	Mazzotti 1940
		indictiva
			Rodent (Muroidea)	Neotoma	Associational	Wood 1941; Lent and Wygodzinsky 1979
		infestans
			Amphibian		Antibody-based	Schenone et al. 1985
			Bats		Antibody-based	Barretto 1968
			Bird		Antibody-based | Associational	Correa and Aguiar 1952: Mayer and Alcaraz 1955; Barretto 1968; Forattini et al. 1981; Forattini et al. 1982; Vallvé et al. 1995; Gurtler et al. 1997; Lorosa et al. 2000c | Wanderley et al. 2006
				Amazona aestiva (Berlepsch) and Aratinga acuticaudata (Vieillot)	Associational	Ceballos et al. 2009
				Coryphistera alaudina	Associational	Marti et al. 2014
				Phacellodomus sibilatrix	Associational	Marti et al. 2014
				Strigiformes (owls)	Antibody-based | Associational	Schenone et al. 1985 | Lent and Wygodzinsky 1979
				Sublegatus modestus	DNA-based (PCR)	Buitrago et al. 2016
			Human		Antibody-based | DNA-based (PCR)	Correa and Aguiar 1952; Mayer and Alcaraz 1955; Barretto 1968; Forattini et al. 1981; Forattini et al. 1982; Wier-Lopez 1982; Vallvé et al. 1995; Gurtler et al. 1996; Gurtler et al. 1997; López et al. 1999; Lorosa et al. 1999a; Lorosa et al. 2000c; Cecere et al. 2016 | Pizarro and Stevens 2008; Buitrago et al. 2013; Roellig et al. 2013; Buitrago et al. 2016
			Marsupial	Didelphimorphia (opossum)	Antibody-based	Freitas et al. 1960; Barretto 1968; Forattini et al. 1981; Forattini et al. 1982; Wisnivesky-Colli et al. 1982: Lorosa et al. 2000c
			Reptile		Antibody-based	Marsden et al. 1979
				Gymnodactylus	DNA-based (PCR)	Buitrago et al. 2016
				Tropidurus	DNA-based (PCR)	Buitrago et al. 2016
			Rodent		Antibody-based	Barretto 1968; Marsden et al. 1979; Forattini et al. 1982; Wier-Lopez 1982, Lorosa et al. 2000c
			Rodent (Cavioidea)	Caviidae	Antibody-based	Schenone et al. 1985, Wisnivesky-Colli et al. 1982
				Caviinae	Antibody-based | DNA-based (PCR)	Cecere et al. 2016 | Pizarro and Stevens 2008
				Cavia porcellus	DNA-based(PCR)	Roellig et al. 2013
				Galea musteloides	DNA-based (PCR)	Buitrago et al. 2013; Buitrago et al. 2016
				Microcavia australis	Associational	Lent and Wygodzinsky 1979
			Rodent (Chinchilloidea)	Lagidium viscacia	DNA-based (PCR)	Buitrago et al. 2016
			Rodent (Muroidea)		Antibody-based	Wisnivesky-Colli et al. 1982
				Akodon glaucinus	DNA-based (PCR)	Buitrago et al. 2016
				Graomys	DNA-based (PCR)	Buitrago et al. 2016
				Graomys domorum	DNA-based (PCR)	Buitrago et al. 2016
				Phyllotis wolffshoni	DNA-based (PCR)	Buitrago et al. 2016
				Phyllotis xantophigus	DNA-based (PCR)	Buitrago et al. 2016
				Rattus rattus	DNA-based (PCR)	Roellig et al. 2013
			Rodent (Octodontoidea)	Octodontomys gliroides	DNA-based (PCR)	Buitrago et al. 2013; Buitrago et al. 2016
		jatai
		juazeirensis
		jurbergi
			Bird		Antibody-based	Lorosa et al. 2003; Lorosa et al. 2008
				Psittacidae	Associational	Lorosa et al. 2003
			Marsupial	Didelphimorphia (opossum)	Antibody-based	Lorosa et al. 2003
			Musteloid (Mephitidae; Skunk)		Antibody-based	Lorosa et al. 2008
			Reptile	Lacertilia (Lizard)	Antibody-based	Lorosa et al. 2003
			Rodent		Antibody-based | Associational	Lorosa et al. 2003; Lorosa et al. 2008 | Lorosa et al. 2003
		klugi
		lecticularia
			Human		Associational | DNA-based (PCR)	Lent and Wygodzinsky 1979; Martinez-Ibarra et al. 1992 | Gorchakov et al. 2016
			Musteloid (Procyonidae; Racoons and relatives)	Procyon lotor	DNA-based (PCR)	Gorchakov et al. 2016
			Rodent (Muroidea)	Neotoma micropus	Associational	Lent and Wygodzinsky 1979
			Rodent (Sciuromorpha)	Scuirus niger	DNA-based (PCR)	Gorchakov et al. 2016
				Spermophilus variegatus	Associational	Packchanian 1939
		lenti
			Armadillo		Associational	Sherlock and Serafim 1967; Sherlock and Serafim 1972
			Human		Associational	Sherlock and Serafim 1967
			Rodent (Muroidea)	Murinae (mouse)	Associational	Sherlock and Serafim 1967; Sherlock and Serafim 1972
		leopoldi
		limai
			Rodent		Associational	Lent and Wygodzinsky 1979, Barrett 1991
	(Meccus)	longipennis
			Armadillo		Antibody-based	Breniere et al. 2004
				Dasypus novemcinctus	Associational | DNA-based (PCR)	Ryckman and Ryckman 1967b | Bosseno et al. 2009
			Bat		Associational	Lent and Wygodzinsky 1979
			Felid	Lynx rufus	DNA-based (PCR)	Bosseno et al. 2009
			Human		DNA-based (PCR)	Bosseno et al. 2006
			Musteloid (Procyonidae; Racoons and relatives)	Procyon lotor	DNA-based (PCR)	Bosseno et al. 2009
			Marsupial	Didelphimorphia (opossum)	Antibody-based	Breniere et al. 2004
				Didelphis virginiana	DNA-based (PCR)	Bosseno et al. 2006
				Philander opossum	DNA-based (PCR)	Bosseno et al. 2009
			Musteloid (Mephitidae; Skunk)	Mephitis macroura	DNA-based (PCR)	Bosseno et al. 2009
			Reptile	Sceloporus occidentalis	DNA-based (PCR)	Bosseno et al. 2009
			Rodent (Muroidea)		Antibody-based | DNA-based	Breniere et al. 2004 | Bosseno et al. 2006
				Sigmodon mascotensis	DNA-based (PCR)	Bosseno et al. 2009
				Rattus rattus	DNA-based (PCR)	Bosseno et al. 2006
				Reithrodontomys fulvescens	DNA-based (PCR)	Bosseno et al. 2009
			Shrew	Megasorex gigas	DNA-based (PCR)	Bosseno et al. 2009
		maculata
			Amphibian		Antibody-based	Tonn et al. 1978; Tonn et al. 1982
			Anteater	Tamandua tetradactyla	Antibody-based	Guerrero de Moyeja and Scorza 1981
			Armadillo	Dasypus novemcinctus	Antibody-based	Guerrero de Moyeja and Scorza 1981; Tonn et al. 1982
			Bat		Associational	Barrett 1991
			Bird		Antibody-based | Associational	Tonn et al. 1982 | Guerrero et al. 1965
				Columba livia	Associational	Lent and Wygodzinsky 1979; Ryckman 1986; Ricardo-Silva et al. 2016
				Dendorocolapidae	Antibody-based	Carcavallo and Martínez 1985
				Furnariidae	Antibody-based	Carcavallo and Martínez 1985
				Jabiru mycteria	Associational	Carcavallo and Martínez 1985
				Mycteria	Antibody-based	Carcavallo and Martínez 1985
				Phacellodomus rufifrons	Associational	Carcavallo et al. 1975; Lent and Wygodzinsky 1979
			Humans		Antibody-based | Associational | DNA-based	Tonn 1978; Tonn et al. 1982 | Ryckman 1986 | Cantillo-Barraza et al. 2015; Hernández et al. 2016
			Marsupial	Didelphis marsupialis	Antibody-based	Guerrero de Moyeja and Scorza 1981
			Lagomorph		Antibody-based	Tonn et al. 1982
			Reptile		Antibody-based	Tonn et al. 1982
				Thecadactylus rapicauda	Associational	Reyes-Lugo et al. 2011
			Rodent		Antibody-based	Tonn et al. 1978; Guerrero de Moyeja and Scorza 1981; Tonn et al. 1982
			Rodent (Muroidea)	Sigmodon	Antibody-based	Guerrero de Moyeja and Scorza 1981
		matogrossensis
			Bird		Antibody-based	Lorosa et al. 2008
			Musteloid (Mephitidae; Skunk)		Antibody-based	Lorosa et al. 2008
			Rodent		Antibody-based	Lorosa et al. 2008
	(Hermanlentia)	matsunoi
	(Meccus)	mazzottii
			Armadillo	Dasypus novemcinctus	Associational	Biagi et al. 1964; Tay 1981
			Bat		Associational	Rojas et al. 1989
			Humans		Associational	Lent and Wygodzinsky 1979
			Rodent		Associational	Rojas et al. 1989
			Rodent (Muroidea)	Neotoma	Associational	Lent and Wygodzinsky 1979
		melanica
			Armadillo		Antibody-based	Costa et al. 1998
			Bird		Antibody-based	Costa et al. 1998
			Marsupial	Didelphimorphia (opossum)	Antibody-based	Costa et al. 1998
			Rodent		Antibody-based	Costa et al. 1998
		melanocephala
			Marsupial	Didelphis albiventris	Associational	Barrett et al. 1980
		melanosoma
			Bird	Furnariidae	Associational	González-Britez et al. 2000
		mexicana
		migrans
		neotomae
			Rodent (Muroidea)	Neotoma micropus	Associational	Ryckman 1986
		nigromaculata
			Armadillo	Dasypodidae	Associational	Carcavallo et al. 1998
			Bird		Associational	Carcavallo et al. 1998
			Marsupial	Didelphimorphia (opossum)	Associational	Carcavallo et al. 1985
			Human		Associational	Lent and Wygodzinsky 1979
		nitida
			Rodent (Muroidea)	Neotoma	Associational	Carcavallo 1987
	(Nesotriatoma)	obscura
			Human		Associational	Lent and Wygodzinsky 1979
			Rodent (Octodontoidea)	Geocapromys brownii	Associational	Carcavallo et al. 1998
		oliveirai
			Rodent (Cavioidea)	Cavia aperea	Associational	Neiva et al. 1939
	(Meccus)	pallidipennis
			Armadillo	Dasypus novemcinctus	Associational	Brumpt et al. 1939
			Bat	Myotis	DNA-based (PCR)	Mota et al. 2007
			Marsupial	Didelphis marsupialis	Associational	Zárate and Zárate 1985
				Didelphis virginiana	DNA-based (PCR)	Ramsey et al. 2012
			Rodent (Muroidea)	Baiomys musculus	DNA-based (PCR)	Mota et al. 2007
				Mus musculus	DNA-based (PCR)	Ramsey et al. 2012
				Neotoma alleni	Associational	Brumpt et al. 1939
				Peromyscus	DNA-based (PCR)	Georgieva et al. 2016
				Sigmodon hispidus	DNA-based (PCR)	Mota et al. 2007; Ramsey et al. 2012
	(Mepraia)	parapatrica
			Bird
				Larus dominicanus	Antibody-based	Sagua Franco et al. 2000
				Larus modestus	Antibody-based	Sagua Franco et al. 2000
				Spheniscus humboldti	Antibody-based	Sagua Franco et al. 2000
				Pelecannus occidentalis	Antibody-based	Sagua Franco et al. 2000
			Pinniped	Otaria flavescens	Antibody-based	Sagua Franco et al. 2000
			Reptile	Lacertilia (Lizard)	Associational	Frías-Lasserre 2010
				Tachymenis peruvianus	Antibody-based	Sagua Franco et al. 2000
		patagonica
			Armadillo	Dasypodidae	Associational	Abalos and Wygodzinsky 1951
			Rodent (Cavioidea)	Microcavia australis	Associational	Lent and Wygodzinsky 1979
			Rodent (Muroidea)	Graomys	Associational	Lent and Wygodzinsky 1979
				Muridae	Associational	Abalos and Wygodzinsky 1951
		peninsularis
			Rodent (Muroidea)	Neotoma lepida	Associational	Ryckman 1986
		petrochiae
			Rodent (Cavioidea)	Kerodon rupestris	Associational	Lucena 1970
	(Meccus)	phyllosoma
			Human		Associational	Ryckman 1986
			Musteloid (Mephitidae; Skunk)		Associational	Ryckman 1986
			Reptile	Lacertilia (Lizard)	Associational	Ryckman 1986
			Rodent (Muroidea)	Baiomys musculus	DNA-based (PCR)	Mota et al. 2007
				Neotoma alleni	Associational	Ryckman 1986
			Rodent (Sciuromorpha)	Marmotini (Ground squirrels)	Associational	Ryckman 1986
		picturata
	(Meccus)	pintodiasi
		platensis
			Bird		Associational	Bar and Wisnivesky-Colli 2001
				Anumbius annumbi	Associational	Salvatella 1987
				Coryphistera alaudina	Associational	Brewer et al. 1978; Turienzo and Di Iorio 2014; Marti et al. 2014
				Furnariidae	Associational	González-Britez et al. 2000
				Myiopsitta monacha	Associational	Lent and Wygodzinsky 1979
				Pseudoseisura lophotes	Associational	Lent and Wygodzinsky 1979; Turienzo and Di Iorio 2014
			Marsupial	Lutreolina crassacauda	Associational	Lent and Wygodzinsky 1979
			Rodent (Cavioidea)	Microcavia australis.	Associational	Lent and Wygodzinsky 1979
		protracta	Rodent (Muroidea)	Phyllotis cachinus	Associational	Lent and Wygodzinsky 1979
			Human		Associational | DNA-based (PCR)	Lent and Wygodzinsky 1979; Dolhun and Antes 2016 | Stevens et al. 2012
			Marsupial	Didelphis	DNA-based (PCR)	Klotz et al. 2014
			Rodent (Muroidea)	Neotoma albigula	Associational	Lent and Wygodzinsky 1979
				Neotoma fuscipes	Associational	Ryckman 1962
				Neotoma lepida	Associational	Ryckman 1962
				Neotoma micropus	Associational | DNA-based (PCR)	Ryckman 1962 | Kjos et al. 2013
		pseudomaculata
			Armadillo	Dasypodidae	Associational	Dias-Lima et al. 2003
			Arthropod	Blattodea (Cockroach)	Antibody-based	Freitas et al. 2005
			Bird		Antibody-based | Associational	Marcondes et al. 1991; Freitas et al. 2005 | Guarneri et al. 2000; Barbosa-Silva et al. 2016
				Pseudoseisura cristata	Associational	Dias-Lima et al. 2003
			Human		Antibody-based	Freitas et al. 2005
			Marsupial		Antibody-based	Bento et al. 1984; Marcondes et al. 1991; Freitas et al. 2005
			Reptile	Lacertilia (Lizard)	Antibody-based	Freitas et al. 2005
			Rodent		Antibody-based	Marcondes et al. 1991; Freitas et al. 2005
		pugasi
		recurva
			Humans		DNA-based (PCR)	Klotz et al. 2014
			Marsupial	Didelphis	DNA-based (PCR)	Klotz et al. 2014
			Rodent (Muroidea)	Neotoma albigula	Associational	Ryckman and Ryckman 1967b
			Rodent (Sciuromorpha)	Otospermophilus variegatus	Associational	Ryckman 1986
		rubida
			Bat	Pizonyxs vivesi	Associational	Ryckman 1986
			Humans		DNA-based (PCR)	Stevens et al. 2012
			Musteloid (Procyonidae; Racoons and relatives)	Procyon lotor	DNA-based (PCR)	Gorchakov et al. 2016
			Rodent (Muroidea)	Mus musculus	DNA-based (PCR)	Klotz et al. 2014
				Neotoma	DNA-based (PCR)	Klotz et al. 2014
				Neotoma albigula	Associational	Ryckman 1986
				Neotoma lepida	Associational	Ryckman 1986
				Neotoma mexicana	Associational	Ryckman 1986
				Neotoma micropus	Associational	Ryckman 1986
				Neotoma phenax	Associational	Ryckman 1986
				Rattus norvegicus	DNA-based (PCR)	Klotz et al. 2014
		rubrofasciata
			Bird		Antibody-based	Lorosa et al. 1998a
				Columbidae	Associational	Lent 1935
			Human		Antibody-based | Associational	Lorosa et al. 1998a | Wood 1946
			Marsupial	Didelphimorphia (opossum)	Antibody-based	Lorosa et al. 1998a
			Rodent		Antibody-based	Lorosa et al. 1998a; Lorosa et al. 1999a
			Rodent (Muroidea)	Rattus rattus	Antibody-based | Associational	Bonne 1937 | Gaunt and Miles 2000
		rubrovaria
			Amphibian		Associational	Barrett 1991
			Armadillo		Antibody-based	Calegari et al. 1995
				Dasypus hybridus	Associational	Lent and Wygodzinsky 1979
			Arthropod		Antibody-based | Associational	Calegari et al. 1995 | Abalos and Wygodzinsky 1951; Salvatella 1992
				Blaptica dubia	Associational	Ruas-Neto and Corseuil 2002
			Bird		Antibody-based	Calegari et al. 1995; Lorosa et al. 2000c
			Human		Antibody-based	Calegari et al. 1995; Lorosa et al. 2000c, Almeida et al. 2002
			Marsupial		Antibody-based	Lorosa et al. 2000c; Almeida et al. 2002
				Didelphimorphia (opossum)	Antibody-based	Calegari et al. 1995
			Reptile		Antibody-based	Calegari et al. 1995; Almeida et al. 2002
				Lacertilia (Lizard)	Associational	Abalos and Wygodzinsky 1951
			Rodent		Antibody-based	Calegari et al. 1995; Lorosa et al. 2000c
			Rodent (Cavioidea)	Cavia	Associational	Abalos and Wygodzinsky 1951
			Rodent (Muroidea)		Antibody-based	Almeida et al. 2002
		ryckmani
			Arthropod		Antibody-based	Zeledón et al. 2010
			Bird		Antibody-based	Zeledón et al. 2010
				Columbina	Associational	Zeledón et al. 2010
			Reptile	Ctenosaura palearis	Antibody-based	Zeledón et al. 2010
				Lacertilia (Lizard)	Associational	Zeledón et al. 2010
			Rodent		Antibody-based	Zeledón et al. 2010
			Rodent (Muroidea)	Reithrodontomys	Associational	Zeledón et al. 2010
		sanguisuga
			Amphibian	Hyla	Associational	Ryckman 1986
				Hyla cinerea	DNA-based (PCR)	Waleckx et al. 2014
			Armadillo	Dasypus novemcinctus	Associational	Ryckman 1986
			Bird	Cathartes aura	DNA-based (PCR)	Kjos et al. 2013
			Human		DNA-based (PCR)	Waleckx et al. 2014; Gorchakov et al. 2016
			Marsupial	Didelphidae	Associational	Usinger 1944
				Didelphimorphia (opossum)	Associational	Ryckman 1986
			Musteloid (Procyonidae; Racoons and relatives)	Procyon lotor	Associational | DNA-based (PCR)	Ryckman 1986 | Waleckx et al. 2014
			Reptile	Lacertilia (Lizard)	Associational	Ryckman 1986
			Rodent (Muroidea)	Neotoma floridana	Associational | DNA-based (PCR)	Usinger 1944 | Waleckx et al. 2014
				Neotoma micropus	Associational	Lent and Wygodzinsky 1979; Ryckman 1986
				Sigmodon hispidus	Associational	Lent and Wygodzinsky 1979
			Rodent (Sciuromorpha)		Associational	Ryckman 1986
				Sciurus	DNA-based (PCR)	Gorchakov et al. 2016
				Sciurus carolinensis	DNA-based (PCR)	Waleckx et al. 2014; Gorchakov et al. 2016
				Sciurus niger	DNA-based (PCR)	Gorchakov et al. 2016
		sherlocki
		sinaloensis
			Rodent (Muroidea)	Neotoma albigula	Associational	Ryckman 1986
				Neotoma phenax	Associational	Ryckman 1986
		sinica
	(Mepraia)	spinolai
			Bird		Associational	Lent and Wygodzinsky 1979
			Canid	Dusicyon	Associational	Lent and Wygodzinsky 1979
			Human		Antibody-based	Canals et al. 2001
			Lagomorph		Antibody-based | Associational	Canals et al. 2001 | Lent and Wygodzinsky 1979
				Oryctolagus cuniculus (Introduced)	Antibody-based | Associational	Chacón et al. 2016 | Botto-Mahan et al. 2005
			Marsupial	Marmosa	Associational	Lent and Wygodzinsky 1979
				Thylamys elegans	Antibody-based | Associational	Chacón et al. 2016 | Botto-Mahan et al. 2005
			Reptile		Antibody-based	Aguilera et al. 1986
			Rodent		Antibody-based	Knierim et al. 1976; Canals et al. 2001
			Rodent (Chinchilloidea)	Lagidium	Associational	Lent and Wygodzinsky 1979
			Rodent (Muroidea)	Abrothrix olivaceus	Associational	Botto-Mahan et al. 2005
				Oligoryzomys longicaudatus	Associational	Botto-Mahan et al. 2005
				Phyllotis darwini	Antibody-based | Associational	Chacón et al. 2016 | Botto-Mahan et al. 2005
			Rodent (Octodontoidea)	Octodon degus	Antibody-based | Associational	Chacón et al. 2016 | Botto-Mahan et al. 2005
		sordida
			Amphibian		Antibody-based	Lorosa et al. 1998b; Lorosa et al. 2000a
			Armadillo		Antibody-based	Freitas et al. 1960; Barretto 1968
			Bat		Antibody-based | Associational	Barretto 1967; Barretto 1968 | Barretto 1967
			Bird		Antibody-based	Barretto 1966; Barretto 1968; Minter et al. 1973; Minter 1976; Forattini et al. 1981; Forattini et al. 1982; Rodrigues et al. 1992; Pires et al. 1999; Lorosa et al. 2000c; Villela et al. 2010
				Anumbius annumbi	Associational	Barretto and Carvalheiro 1968b
				Aratinga acuticaudata	Associational	Aramburu et al. 2013
				Furnariidae	Associational	Bar and Wisnivesky-Colli 2001
				Heleodytes unicolor	Associational	Barretto 1971
				Myopsitta monachus	Associational	Noireau et al. 2000
				Passer domesticus	Antibody-based | Associational	Zeledón & Rabinovoich 1981 | Zeledón & Rabinovoich 1981
				Phacellodomus rufifrons	Associational	Barretto 1971
				Pseudoseisura lophotes	Associational	Barretto 1971
				Turdus	Associational	Lent 1935
			Human		Antibody-based	Freitas et al. 1960; Barretto 1968; Forattini et al. 1981; Forattini et al. 1982; Lorosa et al. 1998b; Lorosa et al. 1999a; Pires et al. 1999; Lorosa et al. 2000a; Guilherme et al. 2001
			Marsupial		Antibody-based	Lorosa et al. 1999a; Lorosa et al. 2000a
				Didelphimorphia (opossum)	Antibody-based | Associational	Freitas et al. 1960; Barretto 1967; Forattini et al. 1971; Lorosa et al. 1998b; Pires et al. 1999; Bar and Wisnivesky-Colli 2001; Guilherme et al. 2001; de Lima et al. 2015 | Barretto 1967
				Didelphis	Associational	Abalos and Wygodzinsky 1951
				Lutreolina crassicaudata	Associational	Abalos and Wygodzinsky 1951
			Monkey	Cebus apella	Associational	Carcavallo et al. 1998
			Musteloid (Procyonidae; Racoons and relatives)	Nasua	Antibody-based | Associational	de Lima et al. 2015 | de Lima et al. 2015, Santos et al. 2015
			Reptile		Antibody-based	Forattini et al. 1971; Lorosa et al. 1998b
				Lacertilia (Lizard)	Antibody-based	Lorosa et al. 2000a
			Rodent		Antibody-based | Associational	Barretto 1967; Barretto 1968; Forattini et al. 1971; Rocha e Silva et al. 1977; Forattini et al. 1981; Forattini et al. 1982; Rodrigues et al. 1992; Lorosa et al. 1998b; Lorosa et al. 1999a; Pires et al. 1999; Lorosa et al. 2000a; Guilherme et al. 2001; de Lima et al. 2015 | Barretto 1967
			Rodent (Cavioidea)	Cavia aperea	Associational	Abalos and Wygodzinsky 1951
			Rodent (Muroidea)	Akodon aviculoides	Associational	Abalos and Wygodzinsky 1951
				Rattus norwegicus	Associational	Abalos and Wygodzinsky 1951
		tibiamaculata
			Bird		DNA-based (PCR)	Ribeiro et al. 2015
			Marsupial		Antibody-based	Luz and Borba 1966; Ribeiro et al. 2015
				Didelphis azarae	Associational	Lent and Wygodzinsky 1979
				Marmosa cinerea	Associational	Lent and Wygodzinsky 1979
			Rodent		DNA-based (PCR)	Ribeiro et al. 2015
			Rodent (Muroidea)	Oryzomys	Associational	Lent and Wygodzinsky 1979
			Rodent (Octodontoidea)	Echimyidae (Spiny rats)	Associational	Lent and Wygodzinsky 1979
		vandae
			Armadillo		Antibody-based	Lorosa et al. 2003
			Bird		Antibody-based	Lorosa et al. 2003
			Marsupial		Antibody-based	Lorosa et al. 2003
			Reptile	Lacertilia (Lizard)	Antibody-based	Lorosa et al. 2003
			Rodent		Antibody-based	Lorosa et al. 2003
		venosa
		vitticeps
			Armadillo		Antibody-based	Gonçalves et al. 2000; Souza et al. 2011
			Bird		Antibody-based	Gonçalves et al. 2000; Souza et al. 2011
			Human		Antibody-based	Souza et al. 2011
			Marsupial		Antibody-based	Gonçalves et al. 2000; Souza et al. 2011
				Didelphis	Associational	Lent and Wygodzinsky 1979
				Didelphis aurita	Associational	Santos et al. 2005
			Reptile	Lacertilia (Lizard)	Antibody-based	Souza et al. 2011
			Rodent		Antibody-based	Gonçalves et al. 2000; Souza et al. 2011
			Rodent (Cavioidea)	Kerodon rupestris	Associational	Barros et al. 1975; Lent and Wygodzinsky 1979
		williami
			Bird		Antibody-based	Lorosa et al. 2008
			Human		Associational	de Andrade-Neto et al. 2012
			Musteloid (Mephitidae; Skunk)		Antibody-based	Lorosa et al. 2008
			Rodent		Antibody-based	Lorosa et al. 2008
		wygodzinskyi
